# Supplementary material
Source: Springer Nature journal article supplement (https://www.springermedizin.de/resource/supplementary/13075_2012_3997_MOESM3_ESM.pdf/9695740)

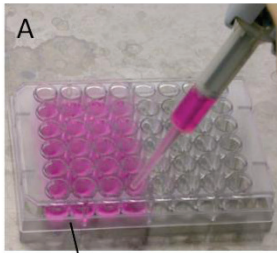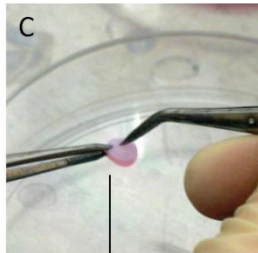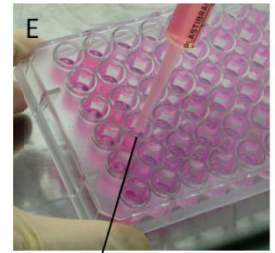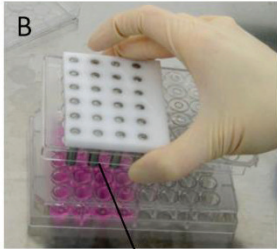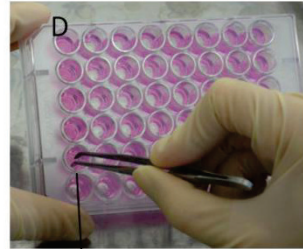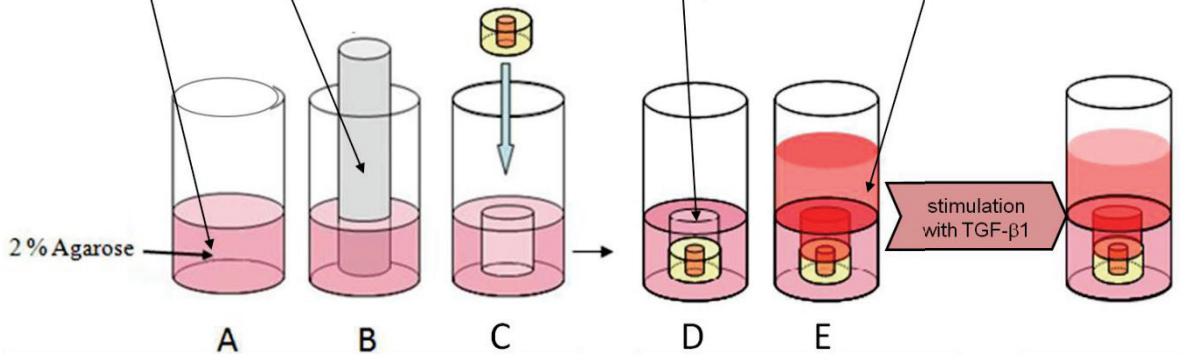

mRNA analysis of chondrocytes located...

...in/on BNC

...on cartilage surface

...in cartilage matrix

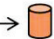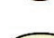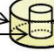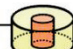

histological /morphological analysis of cartilage/BNC construct

protein analysis of supernatant and cartilage

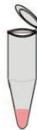

Supplement: MOESM3 [file 9695740]
